# Supplementary material for: Novel Respiratory Syncytial Virus Subtype ON1 among Children, Cape Town, South Africa, 2012
Source: PubMed Central journal article supplement (PMC3647422; doi:10.3201/eid1904.121465), 2013-04
Supplement: 12-1465-Techapp-s1.pdf [file 12-1465-Techapp-s1.pdf]

# Novel Respiratory Syncytial Virus Subtype ON1 among Children, Cape Town, South Africa, 2012

## Technical Appendix

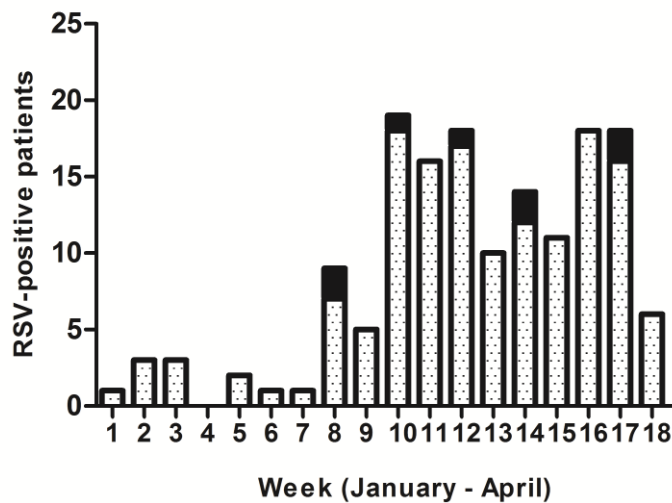

Technical Appendix Figure. Respiratory syncytial virus (RSV) cases among hospitalized children, Cape Town, South Africa. Stippled bar sections indicate non-ON1 genotype infections. Black bar sections indicate ON1 genotype infections.

Technical Appendix Table. Epidemiologic observations for patients infected with respiratory syncytial virus ON1 in a hospital pediatric unit, Cape Town, South Africa\*

| Pt no. | Sex/age, wk | LOS, d | HIV exposure/status | ICU/HDU care | Respiratory support | Discharge diagnosis      | Concurrent conditions                     | Co-infection |
|--------|-------------|--------|---------------------|--------------|---------------------|--------------------------|-------------------------------------------|--------------|
| 1      | F/15        | 2      | U/-                 | No           | No                  | Bronchial pneumonia      | Preterm birth                             | None         |
| 2      | M/1.5       | 1      | U/-                 | No           | No                  | Bronchiolitis            | Neonatal jaundice                         | None         |
| 3      | F/4         | 7      | U/-                 | HDU          | CPAP                | Bronchiolitis            | None                                      | None         |
| 4      | F/3         | 1      | E/-                 | No           | No                  | Bronchiolitis            | None                                      | Adenovirus   |
| 5      | F/10        | 2      | E/-                 | No           | No                  | Lobar pneumonia          | Neonatal sepsis                           | Rhinovirus   |
| 6      | F/8         | 38     | U/-                 | ICU          | IPPV                | Bronchiopneumonia        | Preterm birth                             | None         |
| 7      | F/6.5       | 12     | E/-                 | HDU          | CPAP                | Bronchiopneumonia        | Preterm birth                             | None         |
| 8      | M/60        | 1      | U/-                 | No           | No                  | Bronchiolitis obliterans | Recurrent LRTI after adenovirus infection | Rhinovirus   |

\*Pt, patient; LOS, length of stay in hospital; ICU, intensive care unit; HDU, high dependency unit; U, unexposed; -, negative; E, exposed; LRTI, lower respiratory tract infection; CPAP, continuous positive airway pressure; IPPV, intermittent positive pressure ventilation.
